# Supplementary material for: High energy storage density and ultrafast discharge in lead lutetium niobate based ceramics
Source: Royal Society of Chemistry journal article supplement (doi:10.1039/c9ta00463g), 2019-01-01
Supplement: c9ta00463g1.pdf [file c9ta00463g1.pdf]

# Electronic Supplementary Information

## High energy storage density and ultrafast discharge in lead lutetium niobate based ceramics

Xiaoming Yang,<sup>ab</sup> Fangping Zhuo,<sup>c</sup> Chenxi Wang,<sup>ab</sup> Ying Liu,<sup>a</sup> Zujian Wang,<sup>a</sup> Hamel  
Tailor,<sup>d</sup> Chao He,<sup>\*a</sup> and Xifa Long<sup>a</sup>

*<sup>a</sup>Key Laboratory of Optoelectronic Materials Chemistry and Physics, Collaborative  
Innovation Center for Optoelectronic Semiconductors and Efficient Devices, Fujian  
Institute of Research on the Structure of Matter, Chinese Academy of Sciences, Fuzhou,  
350002, China. E-mail: hechao@fjirsm.ac.cn*

*<sup>b</sup>University of Chinese Academy of Sciences, Beijing, 100049, China*

*<sup>c</sup>Department of Chemistry, Tsinghua University, Beijing, 100084, China*

*<sup>d</sup>Department of Chemistry, Simon Fraser University, Burnaby, British Columbia, V5A  
1S6, Canada*

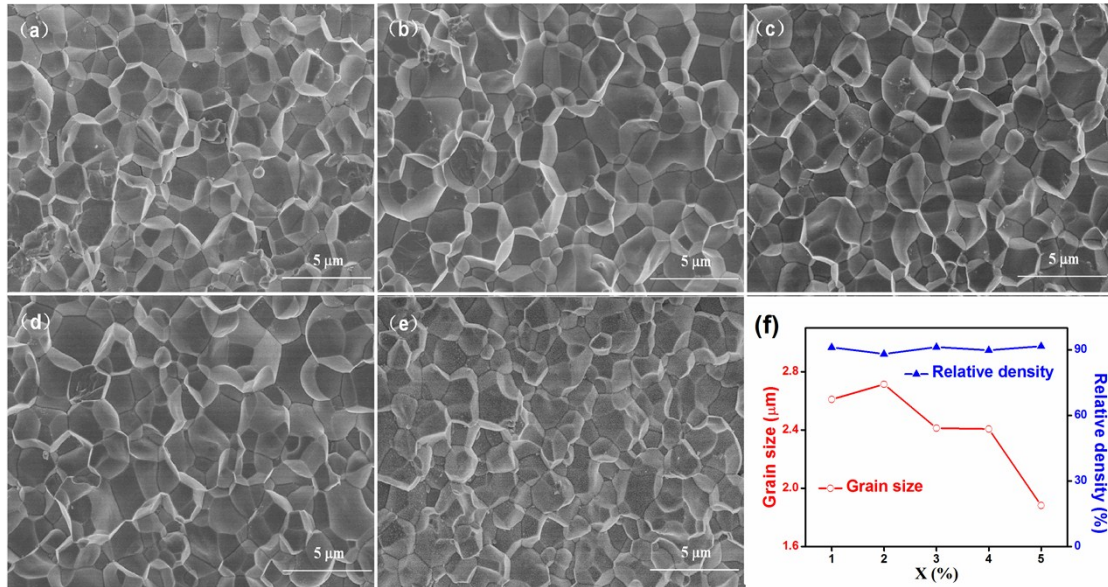

**Fig. S1** (a)-(e) SEM micrographs and (f) the variations of grain size and relative density of PLNMW100x ceramics ( $0.01 \leq x \leq 0.05$ ).

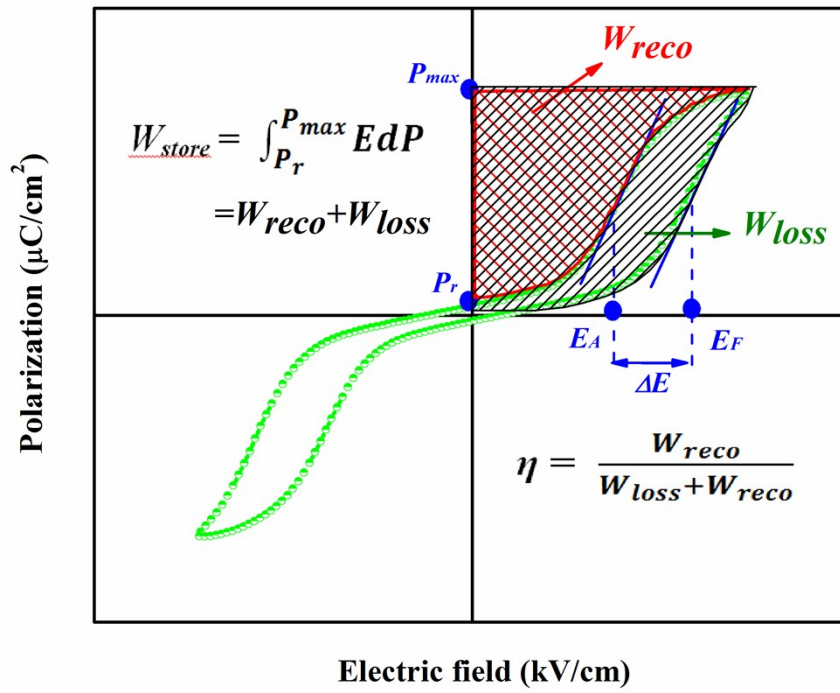

**Fig. S2** Schematic diagram for the calculation of energy storage properties of AFE materials.

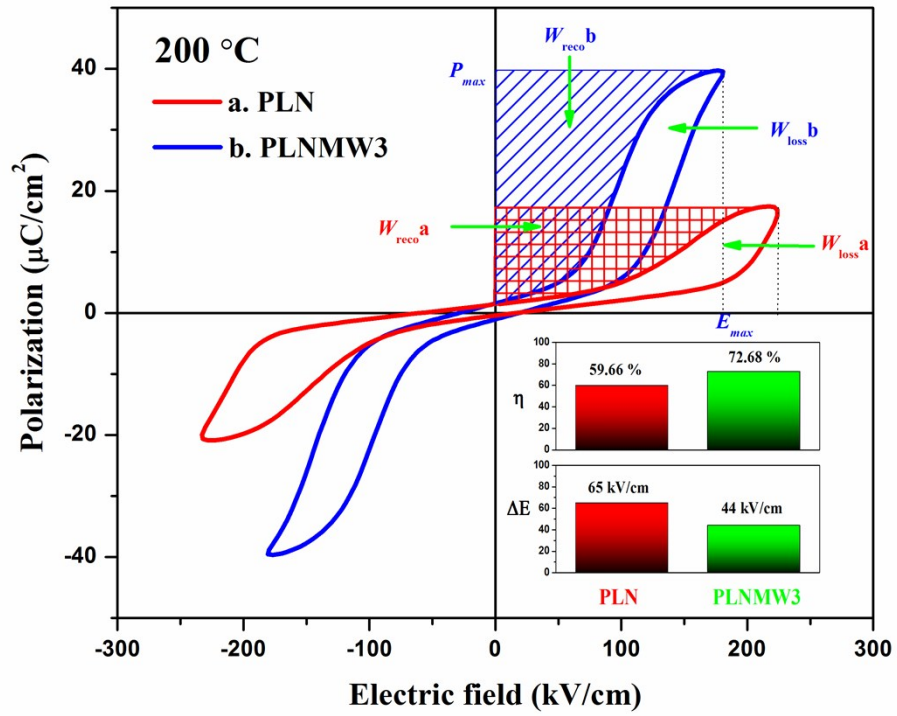

**Fig. S3** Schematic illustrations of energy-storage characteristics for PLN and PLNMW3 ceramics at 200 °C.
